# Supplementary material
Source: publisher site journal article supplement (https://kjim.org/upload/media/kjim-2025-048-Supplementary-Fig-1.pdf)
Supplement: Supplementary file 1 [file kjim-2025-048-Supplementary-Fig-1.pdf]

## 1. 환자 설문 조사지

## I. 비대면진료 경험

## [비대면진료란?]

· 비대면진료란 의사가 환자와 직접 대면하지 않고 의료기관 밖에 있는 환자를 전화(스마트폰)나 컴퓨터 등을 이용하여 진료(건강이나 질병에 대한 진단, 상담, 처방 등)하는 것을 말합니다.

예1) 당뇨병환자가 집에서 영상 혹은 음성 통화를 통해 의사에게 진료받고 약을 처방받는 경우

예2) 비대면진료 애플리케이션(앱/어플, 예: 나만의 닥터, 굿닥, 닥터나우 등)을 이용해 진료, 처방을 받은 경우

문1. 비대면진료를 이용한 시기는 언제인가요? (중복 응답 가능)

- ① 2023년 6월 1일 ~ 2023년 12월 14일 (비대면진료 시범사업 기간)
- ② 2023년 12월 15일 ~ 2024년 2월 22일 (비대면진료 시범사업 개편 후)
- ③ 2024년 2월 23일 이후 (비대면진료 시범사업 전면 허용 후)

## [비대면진료 시범사업]

· 2023년 6월 1일부터 시행되었으며, 대상환자는 의료기관에 방문하여 동일 질환으로 진료받은 경험이 있는 재진 환자와 삼벽지 거주자, 거동이 불편한 노인, 장애인, 감염병 확진 환자 등 의료 취약계층입니다.

## [비대면진료 시범사업 개편]

· 2023년 12월 15일부터 질환에 관계없이 6개월 이내 의료기관에 방문하여 진료받은 경험이 있는 환자로 대상이 확대되었으며, 의료취약지 범위에 응급의료 취약지가 추가되었고, 휴일·야간에는 진료 이력 없이 비대면진료가 가능해졌습니다.

## [비대면진료 시범사업 전면 허용]

· 2024년 2월 23일부터 보건의료 위기 단계가 심각 단계로 상향됨에 따라 누구나 시간과 지역 상관없이 비대면진료가 가능해졌습니다.

문2. 2023년 6월 이후 현재까지, 귀하는 비대면진료를 총 몇 번이나 이용하셨습니다?

- ① 1회
- ② 2~4회
- ③ 5~9회
- ④ 10회 이상

문2-1. 귀하가 가장 최근에 비대면진료를 받은 시기는 언제입니까?

(     ) 년 (     ) 월

※ 아래 문항부터는 가장 최근에 이용한 비대면진료 경험 사례를 기준으로 응답하여 주시기 바랍니다.

문3. 비대면진료로 이용한 의뢰서비스의 종류는 무엇입니까? (중복 응답 가능)

- ① 상담 (증상)
- ② 상담 (검사결과)
- ③ 의약품 처방
- ④ 기타 (     )

Supplementary Figure 1. Survey content.

문4. 비대면진료를 이용한 주된 동기는 무엇입니까? (중복응답 최대 2개)

- ① 의료기관을 방문할 시간이 없어서(이동시간, 대기시간 등 포함)
- ② 의료기관 방문에 필요한 비용 절감을 위해서(교통비, 보호자 비용 등)
- ③ 진료받는 것이 보다 편리해서(진료 예약 및 접수, 의료기관 선택 등)
- ④ 거주지 주변에 의료기관이 없거나 너무 멀어서
- ⑤ 유명하거나 추천받은 병원 등 특정 의료기관에서 진료받기를 원해서
- ⑥ 휴일·야간에 진료가 필요한 상황이 발생해서
- ⑦ 굳이 대면진료를 받아야할 필요성을 느끼지 못해서
- ⑧ 기타 ( )

문5. 비대면진료를 이용한 목적은 무엇입니까?

- ① 만성질환 치료 및 관리 (고혈압·당뇨병·이상지질혈증 등)
- ② 급성 경증질환 치료 및 관리 (감기, 몸살, 오한, 두통, 복통 등)
- ③ 성 관련 질환 치료 및 관리 (비뇨, 생식기 문제 등)
- ④ 정신건강 치료 및 관리 (우울증, 수면장애 등)
- ⑤ 탈모 (발모제 등), 미용 치료 및 관리 (여드름, 비만치료 등)
- ⑥ 희귀질환 관리 및 치료
- ⑦ 수술 치료 후 관리
- ⑧ 기타( )

문6. 비대면진료 유형은 무엇입니까?

- ① 초진 → 문6-1
- ② 초진 아님(재진) → 문6-2

[용어 설명]

· ‘초진’은 귀하가 해당 의료기관에서 해당 증상으로 처음 진료를 받은 경우를 말합니다.

문6-1. 비대면진료 초진인 경우, 비대면진료를 받는데 걸린 시간은 얼마나 됩니까?  
( )분

문6-2. 비대면진료 초진이 아닌(재진)인 경우, 비대면진료를 받는데 걸린 시간은 얼마나 됩니까?  
( )분

문6-3. 비대면진료에서 진료시간이 충분하다고 느끼셨습니까?

- ① 충분함
- ② 충분하지 않음

문6-4. 대면진료를 받는데 평균적으로 걸린 시간은 얼마나 됩니까?  
초진 ( )분, 재진 ( )분

문6-5. 대면진료와 비교했을 때, 비대면진료 시 진료시간은 얼마나 필요하다고 생각되십니까?

- ① 대면진료보다 더 많은 시간이 필요
- ② 대면진료와 비슷한 시간이 필요
- ③ 대면진료보다 더 적은 시간이 필요

문6-6. 적절하다고 생각하는 비대면진료 시간을 자유롭게 서술해 주십시오.  
초진 ( )분, 재진 ( )분

Supplementary Figure 1. Continued.

문7. 비대면진료를 통해 약을 처방 받은 경험이 있습니까?

[비대면진료 시범사업에서 약 처방 및 수령 방법]

- (처방) 환자가 지정하는 약국으로 팩스, 이메일 등 송부
- (의약품 수령) 본인 수령, 대리 수령, 재택 수령\* 등 환자와 약사가 협의하는 방법
- \* 섬·벽지 환자, 취약계층(65세 이상 장기요양등급자, 장애인, 감염병 확진 환자) 희귀 질환자에 한함

① 예 → 문7-1

② 아니오 → 문8

문7-1. 처방 받은 약은 어떻게 수령하였나요?

- ① 본인 수령 (직접 약국 방문)
- ② 대리 수령 (환자 대신 약국 방문)
- ③ 재택 수령 (집에서 약을 배송받음)

문8. 비대면진료 전용 플랫폼(닥터나우, 나만의 닥터, 올라케어, 굿닥, 솔닥, 똑닥 등)을 사용한 경험이 있습니까?

① 예 → 문8-1

② 아니오 → 문8-4

문8-1. 귀하가 경험한 전체 비대면진료 중 비대면진료 전용 플랫폼(앱)을 통해 진료를 신청한 비율은 얼마 되나요?

(        ) %

문8-2. 귀하가 주로 사용하는 비대면진료 플랫폼은 무엇인가요?

- ① 닥터나우
- ② 나만의 닥터
- ③ 올라케어
- ④ 굿닥
- ⑤ 솔닥
- ⑥ 똑닥
- ⑦ 기타(        )

문8-3. 비대면진료 플랫폼(닥터나우, 나만의 닥터, 올라케어, 굿닥, 솔닥, 똑닥 등)을 이용하는 주된 이유는 다음 중 무엇입니까?

- ① 진료과정 (예약, 대기, 안내 등)에서의 편의성
- ② 진료비 결제의 용이성
- ③ 개인정보보호 및 보안에 대한 신뢰
- ④ 의료기관이 다양하고 직접 선택할 수 있어서
- ⑤ 기타(        )

문8-4. 비대면진료 플랫폼(닥터나우, 나만의 닥터, 올라케어, 굿닥, 솔닥, 똑닥 등)을 이용하지 않는 주된 이유는 다음 중 무엇입니까?

- ① 비급여 진료 등 의료비가 비쌀 것 같아서
- ② 복잡한 이용 절차 및 방법
- ③ 개인정보보호 및 보안에 대한 불안
- ④ 관련 정보가 없어서
- ⑤ 기타 (        )

Supplementary Figure 1. Continued.

문9-1. 비대면진료를 이용하는데 사용했던 통신 방법의 비율은 어떻게 되나요? (비율 응답)

- ① 영상 회의 시스템 (줌, 스카이프, MS팀즈, 페이스북 등) ( )%
- ② 메신저 어플리케이션 (카카오톡, 페이스타임, 텔레그램 등) ( )%
- ③ 화상 전화 (통신사 기본 제공) ( )%
- ④ 음성 통화 ( )%

문9-2. 위 문9-1에서 응답한 방법을 주로 사용한 이유는 무엇입니까?

- ① 사용하기 편리해서
- ② 해당 의료기관에서 비대면진료에 사용하는 방법이라
- ③ 정확한 증상 설명이 가능해서
- ④ 특정 기능/서비스가 유용해서 (예약, 이전 진료내역 확인 등)
- ⑤ 기타 ( )

문10. 대면진료 경험에 비교했을 때, 의료적 측면(진단, 처방 등)에서 비대면진료가 안전하다고 느끼셨습니까?

- ① 대면진료에 비해 매우 불안하다 → 문10-1
- ② 대면진료에 비해 다소 불안하다 → 문10-1
- ③ 대면진료와 비슷하다
- ④ 대면진료에 비해 불안하지 않다
- ⑤ 대면진료에 비해 전혀 불안하지 않다

문10-1. 대면진료에 비해 비대면진료가 불안하다고 느끼신 이유는 무엇입니까?

- ① 청진 등이 제한되기 때문에 정확한 진단에 한계가 있음
- ② 특정 환자 특성상 의사소통이 원활하지 않음
- ③ 개인정보 유출 등의 우려
- ④ 기타 ( )

문11. 비대면진료를 이용한 후, 의료기관에 방문한(대면 진료) 경험이 있습니까?

- ① 있다 → 문11-1
- ② 없다 → 문12

문11-1. 대면 진료로 받게 된 가장 주된 이유는 무엇입니까? (순위 응답)

- ① 비대면진료 서비스가 만족스럽지 않아서
- ② 의사의 대면진료 권유 때문에
- ③ 비대면진료만으로는 증상이 호전되지 않아서
- ④ 비대면진료 비용이 비싸서
- ⑤ 기타( )

문11-2. 대면 진료를 이용한 목적은 다음 중 무엇입니까?

- ① 비대면진료와 다른 질환
- ② 비대면진료와 같은 질환

문11-3. 대면 진료를 이용한 의료기관은 비대면진료를 이용한 의료기관과 같은가요?

- ① 예(같은 의료기관 이용) → 문12
- ② 아니요(다른 의료기관 이용) → 문11-4

문11-4. 다른 기관을 이용하신 가장 주된 사유가 무엇입니까?

- ① 증상이 개선되지 않아서
- ② 비대면진료를 이용했던 병원 서비스(진료시간, 예약방법, 응대 등)가 마음에 안들어서

Supplementary Figure 1. Continued.

- ③ 비대면진료를 이용했던 병원이 더 이상 비대면진료 서비스를 하지 않아서  
 ④ 비대면진료를 이용했던 병원이 너무 멀어서  
 ⑤ 기타( )

## II. 비대면진료 만족도

문12. 다음은 비대면진료 시범사업에 대한 만족도를 묻는 것입니다. 각 문항을 읽고 귀하가 가장 가깝다고 생각되는 정도를 판단하여 선택해주시기 바랍니다.

| No | 문항                                                                                                                                                                                                                                 | 전혀<br>그렇지<br>않다 | 대체로<br>그렇지<br>않다 | 보통<br>이다 | 대체로<br>그렇다 | 매우<br>그렇다 |
|----|------------------------------------------------------------------------------------------------------------------------------------------------------------------------------------------------------------------------------------|-----------------|------------------|----------|------------|-----------|
| 1  | 의료진과 쉽게 대화할 수 있습니다.                                                                                                                                                                                                                | ①               | ②                | ③        | ④          | ⑤         |
| 2  | 의료진의 말이 또렷하게 들립니다.                                                                                                                                                                                                                 | ①               | ②                | ③        | ④          | ⑤         |
| 3  | 의료진이 내 건강 관리상태를 파악할 수 있습니다.                                                                                                                                                                                                        | ①               | ②                | ③        | ④          | ⑤         |
| 4  | 나는 마치 직접 만난 것처럼 의료진을 볼 수 있습니다.                                                                                                                                                                                                     | ①               | ②                | ③        | ④          | ⑤         |
| 5  | 시스템을 사용할때 다른 사람의 도움이 필요하지 않습니다.                                                                                                                                                                                                    | ①               | ②                | ③        | ④          | ⑤         |
| 6  | 의료진과 편안하게 소통할 수 있습니다.                                                                                                                                                                                                              | ①               | ②                | ③        | ④          | ⑤         |
| 7  | 비대면진료를 통해 제공되는 의료 서비스는 일관성이 있다고 생각합니다.                                                                                                                                                                                             | ①               | ②                | ③        | ④          | ⑤         |
| 8  | 비대면진료를 이용하여 보다 쉽게 의료서비스를 받을 수 있습니다.                                                                                                                                                                                                | ①               | ②                | ③        | ④          | ⑤         |
| 9  | 비대면진료는 병원이나 전문의에게 갈 시간을 절약해줍니다.                                                                                                                                                                                                    | ①               | ②                | ③        | ④          | ⑤         |
| 10 | 의료진이 나에게 충분히 신경써준다고 생각합니다.                                                                                                                                                                                                         | ①               | ②                | ③        | ④          | ⑤         |
| 11 | 비대면진료는 내가 필요한 의료서비스를 제공해줍니다.                                                                                                                                                                                                       | ①               | ②                | ③        | ④          | ⑤         |
| 12 | 비대면진료는 의료 서비스를 받을 수 있는 적절한 방법이라고 생각합니다.                                                                                                                                                                                            | ①               | ②                | ③        | ④          | ⑤         |
| 13 | 비대면진료 서비스를 다시 이용할 의향이 있습니다.                                                                                                                                                                                                        | ①               | ②                | ③        | ④          | ⑤         |
|    |                                                                                                                                                                                                                                    | → 13-2)         |                  | → 13-1)  |            |           |
|    | 1) 향후에도 비대면진료를 계속 이용하려는 이유는 무엇입니까? (순위응답)<br>① 시간과 거리의 제한 없이 진료를 받을 수 있기 때문에<br>② 의료기관 방문에 필요한 비용 절감을 위해서 (교통비, 보호자 비용 등)<br>③ 진료받는 것이 보다 편해서 (진료 예약 및 접수, 의료기관 선택 등)<br>④ 유명하거나 추천받은 병원 등 특정 의료기관에서 진료받기를 위해서<br>⑤ 휴일·야간 진료가 가능해서 |                 |                  |          |            |           |

Supplementary Figure 1. Continued.

|    |                                                                                                                                                                                                                                                                                                                                                                                                                                                                                                                                                                                                            |        |   |        |   |   |
|----|------------------------------------------------------------------------------------------------------------------------------------------------------------------------------------------------------------------------------------------------------------------------------------------------------------------------------------------------------------------------------------------------------------------------------------------------------------------------------------------------------------------------------------------------------------------------------------------------------------|--------|---|--------|---|---|
|    | ⑥ 기타( )<br><br>2) 더 이상 비대면진료를 이용하지 않으려는 이유는 무엇입니까?(순위응답)<br>① 의료사고 위험성<br>② 복잡한 절차와 적용 대상<br>③ 개인정보 유출 우려<br>④ 대면진료 대비 높은 진료 비용<br>⑤ 기타 ( )                                                                                                                                                                                                                                                                                                                                                                                                                                                                |        |   |        |   |   |
| 14 | 전반적으로 비대면진료를 통해 제공되는 의료서비스의 질에 만족합니다.                                                                                                                                                                                                                                                                                                                                                                                                                                                                                                                                                                      | ①      | ② | ③      | ④ | ⑤ |
|    |                                                                                                                                                                                                                                                                                                                                                                                                                                                                                                                                                                                                            | → 14-2 |   | → 14-1 |   |   |
|    | 1) 다음 중 비대면진료에 만족하는 이유에 대한 순위를 체크해주세요(순위응답)<br>① 시간 관리 용이 (이동시간, 대기시간 등)<br>② 비용 절감 (교통비, 보호자 비용 등)<br>③ 진료받는 것이 편리해서 (진료 예약 및 접수, 의료기관 선택 등)<br>④ 거주지 주변에 의료기관이 없거나 너무 멀어서 의료 이용이 힘든 것에 대한 개선<br>⑤ 만족도가 높은 의료기관에서 진료를 받을 수 있어서<br>⑥ 휴일·야간에 진료를 받을 수 있어서<br>⑦ 기타 ( )<br><br>2) 다음 중 비대면진료에 불만족하는 이유에 대한 순위를 체크해주세요(순위응답)<br>① 질병 관련 증상이나 불편함을 의사에게 명확하게 설명하기 어려움<br>② 의사의 설명이나 지시 사항을 분명하게 이해하기 어려움<br>③ 인터넷 연결이 불안정하거나 기기(휴대폰, 컴퓨터 등) 사용 등 불편함<br>④ 직접 대면하는 진료가 아니기 때문에 잘못된 진단이나 처방 우려<br>⑤ 긴 대기시간<br>⑥ 복잡한 절차 (진료자격 확인 등)<br>⑦ 질환의 증상이 개선되지 않음<br>⑧ 개인의 민감한 정보가 노출될까 염려되어서<br>⑨ 대면진료 대비 높은 비용<br>⑩ 기타( ) |        |   |        |   |   |

Ⅲ. 비대면진료 시범사업의 효과

문13. 비대면진료 시범사업 이후, 시범 사업 이전에 비해 건강 상태를 지속적으로 관찰하게 되었습니까?

① 매우 그러함                      ② 대체로 그러함                      ③ 보통  
 ④ 별로 그렇지 않음                      ⑤ 전혀 그렇지 않음

문13-1. 비대면진료 시범사업에 참여하기 이전에 비해 본인의 건강관리에 더 관심을 가지게 되었습니까?

① 매우 그러함                      ② 대체로 그러함                      ③ 보통  
 ④ 별로 그렇지 않음                      ⑤ 전혀 그렇지 않음

Supplementary Figure 1. Continued.

문14. 비대면진료 시범사업을 이용한 이후로 의사의 조언을 더 잘 따르게 되었습니까?

- ① 매우 그러함                      ② 대체로 그러함                      ③ 보통  
④ 별로 그렇지 않음                      ⑤ 전혀 그렇지 않음

문15. 비대면진료를 제공한 의료기관을 앞으로도 지속적으로 이용하실 계획이십니까?

- ① 매우 그러함                      ② 대체로 그러함                      ③ 보통  
④ 별로 그렇지 않음                      ⑤ 전혀 그렇지 않음

문15-1. 비대면진료를 제공한 의료기관에 대한 신뢰도가 향상되었습니까?

- ① 매우 그러함                      ② 대체로 그러함                      ③ 보통  
④ 별로 그렇지 않음                      ⑤ 전혀 그렇지 않음

문16. 만성질환을 관리하기 위하여 비대면진료가 좋은 방법이라고 생각하십니까?

- ① 매우 그러함                      ② 대체로 그러함                      ③ 보통  
④ 별로 그렇지 않음                      ⑤ 전혀 그렇지 않음

문17. 급성 경증 질환(감기 등) 관리하기 위하여 비대면진료가 좋은 방법이라고 생각하십니까?

- ① 매우 그러함                      ② 대체로 그러함                      ③ 보통  
④ 별로 그렇지 않음                      ⑤ 전혀 그렇지 않음

문18. 비대면진료를 통해 의료서비스에 대한 접근성이 향상되었다고 생각하십니까?

- ① 매우 그러함                      ② 대체로 그러함                      ③ 보통  
④ 별로 그렇지 않음                      ⑤ 전혀 그렇지 않음

#### IV. 비대면진료 허용 범위 관련

문19. 비대면진료 허용 범위에 대해 어떻게 생각하십니까?

| (구 분) 현행 허용 범위                                      | ← 완 화 |  |  |  |  | 유<br>지 | 강 화 → |  |  |  |  |
|-----------------------------------------------------|-------|--|--|--|--|--------|-------|--|--|--|--|
| (대상환자) 6개월 이내 동일의료기관 1회 이상<br>대면진료 경험자에 한정 + 예외적 허용 |       |  |  |  |  |        |       |  |  |  |  |
| (의료기관) 의원급 한정 + 병원급 예외적 허용                          |       |  |  |  |  |        |       |  |  |  |  |
| (의약품) 직접수령과 대리수령만 허용 + 재택수<br>령 예외적 허용              |       |  |  |  |  |        |       |  |  |  |  |
| (진료횟수) 동일 의료기관에서 동일환자에게 한<br>달에 최대 2회까지 시행          |       |  |  |  |  |        |       |  |  |  |  |
| (처방일수) 1회 처방 시 최대 90일 한도 내 처<br>방 가능                |       |  |  |  |  |        |       |  |  |  |  |

문19-1. 비대면진료 허용 범위(제도개선)에 대한 의견을 자유롭게 서술해 주십시오. (선택)  
( )

Supplementary Figure 1. Continued.

## V. 비용 관련

## [비대면진료 시범사업 진료비용]

- 비대면진료를 받으면, 의원급 의료기관 기준으로 대면 진료에 비해 약 30%의 진료비를 추가 부담함
- 대면진료 대비 비대면진료 시 추가적으로 부담하는 금액은 1,100원 정도임
- \* (의원급, 재진 기준) 대면진료(3,700원), 비대면진료(4,800원)

문20. 귀하는 비대면진료를 이용하는데 추가로 소요되는 비용이 적절하다고 생각하십니까?

- ① 매우 낮춰야 한다      ② 약간 낮춰야 한다      ③ 적절하다  
④ 약간 높여야 한다      ⑤ 매우 높여야 한다

문20-1. 적절하다고 생각하는 비대면진료 비용 수준은 얼마인가요?

- \* 현재 비대면진료에 대한 가산요금은 현재 1,100원 수준임
- 현재 대면진료 본인부담금(재진, 의원급 기준) 3,700원
- 현재 비대면진료 본인부담금(재진, 의원급 기준) 4,800원

| 현행 대면진료<br>수준 미만 | 3,700원<br>(현행 대면진료<br>수준) | 4,800원<br>(현행 비대면진료<br>수준) | 5,200원<br>(현행 비대면진료<br>가산료의 30%<br>상향) | 현행 비대면진료<br>가산료의 30%<br>초과 상향 |
|------------------|---------------------------|----------------------------|----------------------------------------|-------------------------------|
| 3,700원 미만        | 3,700                     | 4,800                      | 5,200                                  | 5,200원 초과                     |

문20-2. 위 문20-1의 답변의 이유에 대해 자유롭게 기술해 주세요. (선택)

( )

## VI. 응답자 특성

문21. 귀하의 성별은 무엇입니까?

- ① 남성      ② 여성

문22. 귀하의 연령은 어떻게 되십니까?

- ① 20대    ② 30대    ③ 40대    ④ 50대    ⑤ 60대    ⑥ 70대    ⑦ 80대 이상

문23. 귀하께서 살고 계시는 지역은 어디입니까? (시군구 단위 입력)

( )

문24. 귀하의 최종학력은 어떻게 되십니까?

- ① 고등학교 졸업  
② 대학(4년제 미만) 졸업  
③ 대학(4년제 이상) 졸업



④ 대학원 이상 졸업

⑤ 기타( )

문25. 귀하의 현재 함께 사는 가구원 수는 몇 명입니까? (본인 포함. 혼자 사는 경우 1명으로 입력)  
( )명

문26. 귀 닥의 월 평균 총 가구 소득은 어떻게 되십니까?

① 200만원 미만

② 200~400만원 미만

③ 400~600만원 미만

④ 600~800만원 미만

⑤ 800~1,000만원 미만

⑥ 1,000만원 이상

⑦ 모름/무응답

문27. 귀하는 평소 본인의 전반적인 건강 상태가 어떠하다고 생각하십니까?

① 매우 좋음

② 좋은 편

③ 보통

④ 나쁜 편

⑤ 매우 나쁨

문27-1. 귀하는 평소 건강 관리 및 유지를 위해 얼마나 자주 의료기관을 방문하십니까?

① 주 1회 이상

② 월 1~3회

③ 연 1~11회

④ 연 1회 미만

문28. 귀하는 현재 만성질환(3개월 이상 지속적으로 앓고 있는 의사의 진단을 받은 질병)을 앓고 계십니까?

① 예 → 문28-1

② 아니오

문28-1. 현재 앓고 계신 만성질환은 무엇입니까? (중복 가능)

① 고혈압

② 당뇨병

③ 이상지질혈증

④ 호흡기질환(천식, 결핵 등)

⑤ 신경계질환(치매 등)

⑥ 정신질환(우울증 등)

⑦ 심뇌혈관질환(심근경색, 뇌졸중 등)

⑧ 간의 질환

⑨ 갑상선의 장애

⑩ 기타

문29. 평소 정기적으로 장기간 동안 복용하고 있는 처방의약품이 있나요?

① 예 → 문29-1

② 아니오 → 문30

문29-1. 정기적으로 장기간 동안 복용하는 약의 종류는 무엇인가요? (중복가능)

① 고혈압 관련 약

② 당뇨병 관련 약

③ 이상지질혈증 관련 약

④ 호흡기질환 관련 약

⑤ 신경계질환 관련 약

⑥ 정신질환 관련 약

⑦ 심뇌혈관질환 관련 약

⑧ 간의 질환 관련 약

⑨ 갑상선의 장애 관련 약

⑩ 기타

**Supplementary Figure 1.** Continued.

문30. 귀하가 인터넷이나 디지털 기기(컴퓨터, 휴대폰 등)를 사용하여 수행할 수 있는 것을 모두 선택해 주세요.

- ① 휴대폰으로 간단한 전화, 문자만 가능
- ② 사진, 영상 촬영
- ③ 원하는 정보 검색 및 영상 시청
- ④ SNS 이용 (카카오톡, 라인, 인스타그램, 페이스북 등)
- ⑤ 온라인 쇼핑, 인터넷 뱅킹까지 원활히 사용 가능

## 2. 의사 설문 조사지

## I. 비대면진료 경험

문1. 비대면진료를 실시한 시기는 언제인가요? (중복 가능)

- ① 2023년 6월 1일 ~ 2023년 12월 14일 (비대면진료 시범사업 기간)
- ② 2023년 12월 15일 이후 (비대면진료 시범사업 개편 후)
- ③ 2024년 2월 23일 이후 (비대면진료 시범사업 전면 허용 후)

[비대면진료 시범사업]

· 2023년 6월 1일부터 시행되었으며, 대상환자는 의료기관에 방문하여 동일 질환으로 진료받은 경험이 있는 재진 환자와 삼벽지 거주자, 거동이 불편한 노인, 장애인, 감염병 확진 환자 등 의료 취약계층입니다.

[비대면진료 시범사업 개편]

· 2023년 12월 15일부터 질환에 관계없이 6개월 이내 의료기관에 방문하여 진료받은 경험이 있는 환자로 대상이 확대되었으며, 의료취약지 범위에 응급의료 취약지가 추가되었고, 휴일·야간에는 진료이력 없이 비대면진료가 가능해졌습니다.

[비대면진료 시범사업 전면 허용]

· 2024년 2월 23일부터 보건의료 위기 단계가 심각 단계로 상향됨에 따라 누구나 시간과 지역 상관없이 비대면진료가 가능해졌습니다.

문2. 귀하가 가장 최근에 비대면진료를 시행한 시기는 언제입니까?

(    ) 년 (    ) 월

※ 아래 문항부터는 가장 최근에 시행한 비대면진료 경험 사례를 기준으로 응답하여 주시기 바랍니다.

문3. 비대면진료로 제공한 의료서비스의 종류는 무엇입니까? (중복 가능)

- ① 상담 (증상)
- ② 상담 (검사결과)
- ③ 의약품 처방
- ④ 기타 (    )

문4. 비대면진료 참여의 주된 동기는 무엇입니까? (우선순위 3순위)

- ① 지속적인 만성질환자 모니터링, 관리 용이
- ② 환자들의 요구도 증가
- ③ 진료 대상 환자 확장 가능
- ④ 감염병 관리 용이
- ⑤ 대면진료 대비 높은 수가
- ⑥ 효율적인 진료시간 관리
- ⑦ 비용 절감
- ⑧ 기타 (    )

문5. 근무하시는 의료기관은 무엇입니까?

- ① 의원급 → 문5-1
- ② 병원급 → 문5-2

Supplementary Figure 1. Continued.

문5-1. 해당 의원을 찾는 비대면진료 환자들의 주된 목적(질환)은 무엇입니까?

- ① 만성질환 치료 및 관리 (고혈압·당뇨병·이상지질혈증 등)
- ② 경증질환 치료 및 관리 (감기, 몸살, 오한, 두통, 복통 등)
- ③ 성 관련 질환 치료 및 관리 (비뇨, 생식기 문제 등)
- ④ 정신건강 치료 및 관리 (우울증, 조증 등)
- ⑤ 탈모(발모제 등), 미용 치료 및 관리 (여드름, 비만치료 등)
- ⑥ 기타( )

문5-2. 해당 병원을 찾는 비대면진료 환자들의 주목적은 무엇입니까?

- ① 회귀질환 관리 및 치료
- ② 수술 치료 후 관리
- ③ 기타( )

문6. 전체 진료 중 비대면진료의 진료 비중은 대략 얼마나 됩니까? (진료 건수 기준)  
약 ( )%

문6-1. 일평균 총 진료시간 중 비대면진료 시간은 얼마나 됩니까?

- 일평균 총 진료시간: ( ) 시간/일
- 일평균 비대면진료 시간: ( ) 시간/일

문6-2. 일평균 전체 초진 건수 중 비대면진료를 통한 초진 건수는 얼마나 됩니까?

- 일평균 전체 초진 건수: ( ) 건/일
- 일평균 비대면진료 초진 건수: ( ) 건/일

문7. '비대면진료'에 평균적으로 소요되는 진료시간은 얼마나 됩니까?

초진 약( )분, 재진 약( )분

문7-1. '대면진료'에 평균적으로 소요되는 진료시간은 얼마나 됩니까?

초진 약( )분, 재진 약( )분

문7-2. 비대면진료가 대면진료 시간보다 길어진 경우, 이유는 무엇입니까?

- ① 환자 상태 확인에 시간이 더 걸림
- ② 환자의 궁금증 해소에 시간이 더 걸림
- ③ 진료 준비(대상환자 자격 확인, 장비 준비 등)에 시간이 더 걸림
- ④ 처방전 발행 과정에서의 시간이 더 걸림
- ⑤ 기술 활용으로 시간이 더 걸림 (불안정한 연결 등)
- ⑥ 기타( )

문7-3. 비대면진료가 대면진료 시간보다 짧아진 경우, 이유는 무엇입니까?

- ① 환자 상태 확인 방법의 한계로 인해 문진 시간이 짧아짐
- ② 환자와의 의사소통 제한으로 소요시간이 단축됨
- ③ 진료 준비 시간이 단축됨
- ④ 처방전 발행 과정에서의 시간이 덜 걸림
- ⑤ 기술 활용으로 시간이 덜 걸림 (환자 대기 시스템 등 기술 활용 등)
- ⑥ 기타( )

문7-4. 적절하다고 생각하는 비대면진료 시간을 자유롭게 서술해 주십시오.

초진 ( )분, 재진 ( )분

Supplementary Figure 1. Continued.

문8. 비대면진료를 통해 약을 처방한 경험이 있습니까?

- ① 예 → 문8-1
- ② 아니요 → 문9

문8-1. 비대면진료에서 가장 주된 처방전 송부 방법은 무엇입니까? (순위 응답)

- ① 팩스
- ② 이메일
- ③ 기타( )

문9. 비대면진료 전용 플랫폼(닥터나우, 나만의 닥터, 올라케어, 굿닥, 솔닥, 똑닥 등)을 사용하십니까?

- ① 예 → 문9-1
- ② 아니요 → 문9-4

문9-1. 전체 비대면진료에서 비대면진료 전용 플랫폼을 통해 진료를 요청받은 비율은 얼마나 되나요?  
약 ( )%

문9-2. 귀하가 주로 사용하는 비대면진료 플랫폼은 무엇인가요?

- ① 닥터나우
- ② 나만의 닥터
- ③ 올라케어
- ④ 굿닥
- ⑤ 솔닥
- ⑥ 똑닥
- ⑦ 기타 ( )

문9-3. 비대면진료 플랫폼을 이용하는 주된 이유는 다음 중 무엇입니까?

- ① 진료과정(예약, 대기, 안내 등)에서의 편의성
- ② 진료비 결제의 용이성
- ③ 개인정보보호 및 보안에 대한 신뢰
- ④ 더 많은 환자들이 해당 의료기관의 비대면진료 서비스를 선택할 수 있어서
- ⑤ 기타 ( )

문9-4. 비대면진료 플랫폼을 이용하지 않는 주된 이유는 다음 중 무엇입니까?

- ① 비급여 진료 등 과도한 경쟁이 있을 것 같아서
- ② 복잡한 이용 절차 및 방법
- ③ 개인정보보호 및 보안에 대한 불안
- ④ 비대면진료 플랫폼 이용 비용 부담
- ⑤ 비대면진료 플랫폼 설치, 셋팅 등의 과정에서의 번거로움
- ⑥ 기타 ( )

문10. 비대면진료를 위해 주로 이용하는 통신 방법은 다음 중 무엇입니까?

- ① 영상 회의 시스템 (줌, 스카이프, MS팀스, 페이스북 등)
- ② 메신저 어플리케이션 (카카오톡, 페이스타임, 텔레그램 등)
- ③ 화상 전화 (통신사 기본 제공)
- ④ 음성 통화

Supplementary Figure 1. Continued.

문10-1. 위 문10에서 응답한 방법을 주로 사용하는 이유는 무엇입니까?

- ① 사용하기 편리해서
- ② 해당 의료기관에서 비대면진료에 사용하는 방법이라서
- ③ 정확한 증상 설명이 가능해서
- ④ 특정 기능/서비스가 유용해서 (예약, 이전 진료내역 확인 등)
- ⑤ 기타 ( )

문10-2. 비대면진료를 이용하는데 사용했던 통신 방법의 비율은 어떻게 되나요? (비율 응답)

- ① 영상 회의 시스템 (줌, 스카이프, MS팀즈, 페이스북 등) ( )%
- ② 메신저 어플리케이션 (카카오톡, 페이스타임, 텔레그램 등) ( )%
- ③ 화상 전화 (통신사 기본 제공) ( )%
- ④ 음성 통화 ( )%

문11. 비대면진료 시 대면진료 경험에 비교했을 때, 의료적 측면(진단, 처방 등)에서 안전하다고 느꼈습니까?

- ① 대면진료에 비해 매우 불안하다 → 문11-1
- ② 대면진료에 비해 다소 불안하다 → 문11-1
- ③ 대면진료와 비슷하다
- ④ 대면진료에 비해 불안하지 않다
- ⑤ 대면진료에 비해 전혀 불안하지 않다

문11-1. 대면진료 경험 대비 비대면진료가 불안하다고 느낀 이유는 무엇입니까?  
( )

## II. 비대면진료 만족도

문12. 다음은 비대면진료 시범사업에 대한 만족도를 묻는 것입니다. 각 문항을 읽고 귀하가 가장 가깝다고 생각되는 정도를 판단하여 선택해주시기 바랍니다.

| No | 문항                                  | 전혀 그렇지 않다 | 대체로 그렇지 않다 | 보통 이다 | 대체로 그렇다 | 매우 그렇다 |
|----|-------------------------------------|-----------|------------|-------|---------|--------|
| 1  | 비대면진료 덕분에 의료 서비스 접근이 나아졌습니다         | ①         | ②          | ③     | ④       | ⑤      |
| 2  | 비대면진료는 환자들이 병·의원으로 이동하는 시간을 절약해줍니다. | ①         | ②          | ③     | ④       | ⑤      |
| 3  | 비대면진료는 환자들이 필요한 의료서비스를 제공해 줍니다.     | ①         | ②          | ③     | ④       | ⑤      |
| 4  | 시스템 사용이 간단했습니다                      | ①         | ②          | ③     | ④       | ⑤      |
| 5  | 시스템 사용을 배우기 쉬웠습니다                   | ①         | ②          | ③     | ④       | ⑤      |
| 6  | 시스템 사용을 통해 빠르게 결실을 맺을 수 있다고 생각합니다.  | ①         | ②          | ③     | ④       | ⑤      |
| 7  | 이 시스템과 상호 작용하는 방식이 좋습니다             | ①         | ②          | ③     | ④       | ⑤      |
| 8  | 이 시스템 사용을 좋아합니다                     | ①         | ②          | ③     | ④       | ⑤      |

Supplementary Figure 1. Continued.

|    |                                                                                                                                                                                                                                                                                                                                                                                                                                                                                   |         |   |         |   |   |
|----|-----------------------------------------------------------------------------------------------------------------------------------------------------------------------------------------------------------------------------------------------------------------------------------------------------------------------------------------------------------------------------------------------------------------------------------------------------------------------------------|---------|---|---------|---|---|
| 9  | 이 시스템은 간단하고 이해하기 쉽습니다.                                                                                                                                                                                                                                                                                                                                                                                                                                                            | ①       | ② | ③       | ④ | ⑤ |
| 10 | 이 시스템은 내가 이것에서 기대하는 모든 것을 할 수 있게 해줍니다.                                                                                                                                                                                                                                                                                                                                                                                                                                            | ①       | ② | ③       | ④ | ⑤ |
| 11 | 비대면진료 시스템을 통해 환자와 쉽게 대화할 수 있습니다.                                                                                                                                                                                                                                                                                                                                                                                                                                                  | ①       | ② | ③       | ④ | ⑤ |
| 12 | 비대면진료 시스템을 통해 환자의 말을 또렷하게 들을 수 있습니다.                                                                                                                                                                                                                                                                                                                                                                                                                                              | ①       | ② | ③       | ④ | ⑤ |
| 13 | 내 의견을 효과적으로 전달할 수 있었다고 생각합니다.                                                                                                                                                                                                                                                                                                                                                                                                                                                     | ①       | ② | ③       | ④ | ⑤ |
| 14 | 비대면진료 시스템을 사용하여 마치 직접 만나는 것처럼 환자를 볼 수 있습니다.                                                                                                                                                                                                                                                                                                                                                                                                                                       | ①       | ② | ③       | ④ | ⑤ |
| 15 | 비대면진료 시스템을 통해 제공되는 진료는 대면 진료와 마찬가지로 생각합니다                                                                                                                                                                                                                                                                                                                                                                                                                                         | ①       | ② | ③       | ④ | ⑤ |
| 16 | 시스템 사용 중 실수를 해도 쉽고 빠르게 해결할 수 있었습니다.                                                                                                                                                                                                                                                                                                                                                                                                                                               | ①       | ② | ③       | ④ | ⑤ |
| 17 | 시스템은 문제 해결 방법을 명확하게 알려주는 오류 메시지를 제공했습니다.                                                                                                                                                                                                                                                                                                                                                                                                                                          | ①       | ② | ③       | ④ | ⑤ |
| 18 | 비대면진료 시스템을 통한 환자와의 소통이 편안했다고 느낍니다.                                                                                                                                                                                                                                                                                                                                                                                                                                                | ①       | ② | ③       | ④ | ⑤ |
| 19 | 비대면진료는 의료 서비스를 받을 수 있는 괜찮은 방법입니다.                                                                                                                                                                                                                                                                                                                                                                                                                                                 | ①       | ② | ③       | ④ | ⑤ |
| 20 | 비대면진료 서비스를 계속 시행할 생각입니다.                                                                                                                                                                                                                                                                                                                                                                                                                                                          | ①       | ② | ③       | ④ | ⑤ |
|    |                                                                                                                                                                                                                                                                                                                                                                                                                                                                                   | → 20-2) |   | → 20-1) |   |   |
|    | 1) 향후에도 비대면진료를 계속 참여하려는 이유는 무엇입니까? (순위응답)<br>① 효율적인 진료시간 관리<br>② 비용 절감<br>③ 진료 대상 환자 확장 가능<br>④ 편의성 (진료 예약 및 접수, 진료 기록 확인 등)<br>⑤ 지속적인 환자 모니터링, 관리 용이<br>⑥ 감염병 관리 용이<br>⑦ 대면진료 대비 높은 진료 수가<br>⑧ 기타(        )<br><br>2) 더 이상 비대면진료를 시행하지 않으려는 이유는 무엇입니까? (순위응답)<br>① 환자의 정확한 질병 관련 증상이나 불편함 표현에 한계<br>② 인터넷 연결 문제 또는 기기 사용의 불편함<br>③ 의료사고 발생의 위험성 및 법적 책임 소재 불분명<br>④ 의료진의 업무량 증가<br>⑤ 단순 약 처방 등 진료 과정의 질적 저하<br>⑥ 질환의 증상이 비대면진료만으로는 개선되기 어려움<br>⑦ 개인정보 유출의 위험성<br>⑧ 기타 (        ) |         |   |         |   |   |

Supplementary Figure 1. Continued.

|    |                                                                                                                                                                                                                                                                                                                                                                                                                                                                                                                                                                                                                                                                                                           |        |   |        |   |   |
|----|-----------------------------------------------------------------------------------------------------------------------------------------------------------------------------------------------------------------------------------------------------------------------------------------------------------------------------------------------------------------------------------------------------------------------------------------------------------------------------------------------------------------------------------------------------------------------------------------------------------------------------------------------------------------------------------------------------------|--------|---|--------|---|---|
| 21 | 전반적으로 나는 이 비대면진료 시스템에 만족합니다.                                                                                                                                                                                                                                                                                                                                                                                                                                                                                                                                                                                                                                                                              | ①      | ② | ③      | ④ | ⑤ |
|    |                                                                                                                                                                                                                                                                                                                                                                                                                                                                                                                                                                                                                                                                                                           | → 21-2 |   | → 21-1 |   |   |
|    | <p>1) 다음 중 비대면진료에 만족하는 이유에 대한 순위를 체크해주세요 (순위응답)</p> <p>① 효율적인 진료시간 관리<br/>         ② 비용 절감<br/>         ③ 진료 대상 환자 확장 가능<br/>         ④ 편의성 (진료 예약 및 접수, 진료 기록 확인 등)<br/>         ⑤ 지속적인 환자 모니터링, 관리 용이<br/>         ⑥ 감염병 관리 용이<br/>         ⑦ 대면진료 대비 높은 진료 수가<br/>         ⑧ 기타( )</p> <p>2) 다음 중 비대면진료에 불만족하는 이유에 대한 순위를 체크해주세요 (순위응답)</p> <p>① 환자가 질환관련 증상이나 불편함을 의사에게 명확하게 설명하기 어려움<br/>         ② 의사의 설명이나 지시 사항을 환자가 분명하게 이해하기 어려움<br/>         ③ 인터넷 연결의 문제 또는 기기(휴대폰, 컴퓨터 등) 사용의 불편함<br/>         ④ 의료사고 발생의 위험성 및 법적 책임 소재 불분명<br/>         ⑤ 의료진의 업무량 증가<br/>         ⑥ 단순 약 처방 등 진료 과정의 질적 저하<br/>         ⑦ 질환의 증상이 비대면진료만으로는 개선되기 어려움<br/>         ⑧ 개인정보 유출의 위험성<br/>         ⑨ 기타( )</p> |        |   |        |   |   |

### Ⅲ. 비대면진료 허용 범위 관련

문13. 비대면진료 허용 범위에 대해 어떻게 생각하십니까?

| (구 분) 현행 허용 범위                                  | ← 완 화 |    |    |    |    | 유 지 | 강 화 → |   |   |   |   |
|-------------------------------------------------|-------|----|----|----|----|-----|-------|---|---|---|---|
|                                                 | -5    | -4 | -3 | -2 | -1 | 0   | 1     | 2 | 3 | 4 | 5 |
| (대상환자) 6개월이내 동일의료기관 1회 이상 대면진료 경험자에 한정 + 예외적 허용 |       |    |    |    |    |     |       |   |   |   |   |
| (의료기관) 의원급 한정 + 병원급 예외적 허용                      |       |    |    |    |    |     |       |   |   |   |   |
| (의약품) 직접수령과 대리수령만 허용 + 재택수령 예외적 허용              |       |    |    |    |    |     |       |   |   |   |   |
| (진료횟수) 동일 의료기관에서 동일환자에게 한 달에 최대 2회까지 시행         |       |    |    |    |    |     |       |   |   |   |   |
| (처방일수) 1회 처방 시 최대 90일 한도 내 처방 가능                |       |    |    |    |    |     |       |   |   |   |   |

Supplementary Figure 1. Continued.



문13-1. 비대면진료 허용 범위(제도개선)에 대한 의견을 자유롭게 서술해 주십시오. (선택)  
( )

## V. 비용 관련

[비대면진료 시범사업 관리료]

· 비대면진료 관리료: 의원급 3,720원, 병원급 이상 3,220원

문14. 비대면진료 비용(시범사업 관리료)은 적절하다고 생각하십니까?

- ① 매우 낮춰야 한다      ② 약간 낮춰야 한다      ③ 적절하다  
④ 약간 높여야 한다      ⑤ 매우 높여야 한다

문14-1. 적절하다고 생각하는 비대면진료 비용 수준은 얼마인가요?

\* 비대면진료에 대한 가산요금은 의원 기준 3,720원임

문14-2. 위 문14-1의 답변의 이유에 대해 자유롭게 기술해 주세요.(선택)  
( )

## VI. 응답자 특성

문15. 귀하의 근무기관은 어떻게 되십니까?

- ① 의원급  
② 병원급

문15-1. 귀하의 근무형태는 어떻게 되십니까?

- ① 개인의  
② 봉직의

문15-2. 귀하의 진료과목은 어떻게 되십니까?

( )

문16. 귀하의 성별은 어떻게 되십니까?

- ① 남성      ② 여성

문17. 귀하의 연령은 어떻게 되십니까?

- ① 20대    ② 30대    ③ 40대    ④ 50대    ⑤ 60대    ⑥ 70대    ⑦ 80대 이상

문18. 귀하가 임상에서 환자를 진료한 기간은 어떻게 되십니까?

- ① 5년 미만  
② 5년 이상 ~10년 미만  
③ 10년 이상~15년 미만  
④ 15년 이상~20년 미만  
⑤ 20년 이상~25년 미만  
⑥ 25년 이상~30년 미만  
⑦ 30년 이상

Supplementary Figure 1. Continued.

문19. 귀하께서 의료서비스를 제공하고 계신 지역은 어디입니까? (시군구 단위 입력)  
( )

## 3. 약사 설문 조사지

## I. 비대면진료 경험

문1. 비대면진료 시범사업에 참여한 시기는 언제인가요? (중복 가능)

- ① 2023년 6월 1일 ~ 2023년 12월 14일 (비대면진료 시범사업 기간)
- ② 2023년 12월 15일 이후 (비대면진료 시범사업 개편 후)
- ③ 2024년 2월 23일 이후 (비대면진료 시범사업 전면 허용 후)

[비대면진료 시범사업]

· 2023년 6월 1일부터 시행되었으며, 대상환자는 의료기관에 방문하여 동일 질환으로 진료받은 경험이 있는 재진 환자와 섬벽지 거주자, 거동이 불편한 노인, 장애인, 감염병 확진 환자 등 의료 취약계층입니다.

[비대면진료 시범사업 개편]

· 2023년 12월 15일부터 질환에 관계없이 6개월 이내 의료기관에 방문하여 진료받은 경험이 있는 환자로 대상이 확대되었으며, 의료취약지 범위에 응급의료 취약지가 추가되었고, 휴일·야간에는 진료이력 없이 비대면진료가 가능해졌습니다.

[비대면진료 시범사업 전면 허용]

· 2024년 2월 23일부터 보건의료 위기 단계가 심각 단계로 상향됨에 따라 누구나 시간과 지역 상관없이 비대면진료가 가능해졌습니다.

문2. 귀하가 가장 최근에 비대면진료 시범사업에 참여한 시기는 언제입니까?

(     ) 년 (     ) 월

※ 아래 문항부터는 가장 최근에 시행한 비대면진료 경험 사례를 기준으로 응답하여 주시기 바랍니다.

문3. 비대면진료 환자에게 제공한 의료서비스의 종류는 무엇입니까? (중복 가능)

- ① 조제 및 복약지도
- ② 상담, 교육 등
- ③ 기타 (     )

문4. 비대면진료 시범사업 참여의 주된 동기는 무엇입니까? (순위 응답)

- ① 지속적인 만성질환자 모니터링, 관리 용이
- ② 환자들의 요구도 증가
- ③ 대상 환자 확장 가능
- ④ 감염병 관리 용이
- ⑤ 대면진료 대비 높은 수가
- ⑥ 효율적인 시간 관리
- ⑦ 비용 절감
- ⑧ 기타 (     )

문5. 다음 중 근무하시는 약국은 어디에 해당합니까?

- ① 원외약국
- ② 원내약국

문5-1. 약국을 찾는 비대면진료 환자들의 주목적은 무엇입니까?

Supplementary Figure 1. Continued.

- ① 만성질환 치료 및 관리 (고혈압·당뇨병·이상지질혈증 등)
- ② 경증질환 치료 및 관리 (감기, 몸살, 오한, 두통, 복통 등)
- ③ 성 관련 질환 치료 및 관리 (비뇨, 생식기 문제 등)
- ④ 정신건강 치료 및 관리 (우울증, 조증 등)
- ⑤ 탈모(발모제 등), 미용 치료 및 관리(여드름, 비만치료 등)
- ⑥ 기타( )

문6. 전체 조제 건 중 비대면진료를 통한 조제 비중은 대략 얼마나 됩니까?

약 ( )%

문6-1. 비대면진료를 받은 환자들의 약 수령 방법 비율은 어떻게 되나요?(비율 응답)

- ① 본인 수령 ( )%
- ② 대리수령\* ( )%
- ③ 재택수령 ( )%

\* [비대면조제 의약품의 대리수령자 범위] (의약품 시행령 제10조의2)

1. 환자의 직계존속·비속 및 직계비속의 배우자
  2. 환자의 배우자 및 배우자의 직계존속
  3. 환자의 형제자매
  4. 「노인복지법」 제34조에 따른 노인의료복지시설에서 근무하는 사람
  - 4의2. 「장애인복지법」 제58조제1항제1호의 장애인 거주시설에서 근무하는 사람
  5. 그 밖에 환자의 계속적인 진료를 위해 필요한 경우로서 보건복지부장관이 인정하는 사람\*
- \* ▲ 교정시설 직원, ▲ 무연고자의 실질적 보호자(시설직원 등),  
▲ 환자의 주 보호자(시설직원, 방문간호사, 요양보호사, 간병인, 친척, 이웃, 지인 등)로서 환자의 건강상태를 잘 알고 있고, 평소 진료시에도 동행하여 주치의가 대리상담하여 처방이 가능하다고 판단한 경우는 가족을 대신하여 대리처방 가능

문6-2. 비대면진료에서 처방전 수령 방법은 무엇입니까? (순위 응답)

- ① 팩스
- ② 이메일
- ③ 기타 ( )

문7. 비대면진료 전용 플랫폼(닥터나우, 나만의 닥터, 올라케어, 굿닥, 솔닥, 똑닥 등)을 사용하십니까?

- ① 예 → 문7-1
- ② 아니요 → 문7-4

문7-1. 전체 비대면진료에서 비대면진료 전용 플랫폼을 통해 접수받은 비율은 얼마나 되나요?  
( )%

문7-2. 귀하가 주로 사용하는 비대면진료 플랫폼은 무엇인가요?

- ① 닥터나우
- ② 나만의 닥터
- ③ 올라케어
- ④ 굿닥
- ⑤ 솔닥
- ⑥ 똑닥
- ⑦ 기타( )

Supplementary Figure 1. Continued.

문7-3. 비대면진료 플랫폼을 이용하는 주된 이유는 다음 중 무엇입니까?

- ① 조제 및 수령 과정(대기 및 안내 등)에서의 편의성
- ② 수납의 용이성
- ③ 개인정보보호 및 보안에 대한 신뢰
- ④ 기타( )

문7-4. 비대면진료 플랫폼을 이용하지 않는 주된 이유는 다음 중 무엇입니까?

- ① 비급여 진료 등 과도한 경쟁이 있을 것 같아서
- ② 복잡한 이용 절차 및 방법
- ③ 개인정보보호 및 보안에 대한 불안
- ④ 비대면진료 플랫폼 이용 비용 부담
- ⑤ 기타 ( )

문8. 비대면진료가 대면진료 경험에 비교했을 때, 의료적 측면(처방, 조제 등)에서 안전하다고 느끼셨습니까?

- ① 대면진료에 비해 매우 불안하다 → 문8-1
- ② 대면진료에 비해 다소 불안하다 → 문8-1
- ③ 대면진료와 비슷하다
- ④ 대면진료에 비해 불안하지 않다
- ⑤ 대면진료에 비해 전혀 불안하지 않다

문8-1. 대면진료 경험 대비 비대면진료가 불안하다고 느낀 이유는 무엇입니까?

( )

## II. 비대면진료 만족도

문9. 다음은 비대면진료 시범사업에 대한 만족도를 묻는 것입니다. 각 문항을 읽고 귀하가 가장 가깝다고 생각되는 정도를 판단하여 선택해주시기 바랍니다.

| No | 문항                                  | 전혀 그렇지 않다 | 대체로 그렇지 않다 | 보통 이다 | 대체로 그렇다 | 매우 그렇다 |
|----|-------------------------------------|-----------|------------|-------|---------|--------|
| 1  | 비대면진료 덕분에 의료 서비스 접근이 나아졌습니다         | ①         | ②          | ③     | ④       | ⑤      |
| 2  | 비대면진료는 환자들이 병·의원으로 이동하는 시간을 절약해줍니다. | ①         | ②          | ③     | ④       | ⑤      |
| 3  | 비대면진료는 환자들이 필요한 의료서비스를 제공합니다.       | ①         | ②          | ③     | ④       | ⑤      |
| 4  | 시스템 사용이 간단했습니다                      | ①         | ②          | ③     | ④       | ⑤      |
| 5  | 시스템 사용을 배우기 쉬웠습니다                   | ①         | ②          | ③     | ④       | ⑤      |
| 6  | 시스템 사용을 통해 빠르게 결실을 맺을 수 있다고 생각합니다.  | ①         | ②          | ③     | ④       | ⑤      |
| 7  | 이 시스템과 상호 작용하는 방식이 좋습니다             | ①         | ②          | ③     | ④       | ⑤      |
| 8  | 이 시스템 사용을 좋아합니다                     | ①         | ②          | ③     | ④       | ⑤      |

Supplementary Figure 1. Continued.

|    |                                                                                                                                                                                                                                                                                                                                                                                                                                                                     |         |   |         |   |   |
|----|---------------------------------------------------------------------------------------------------------------------------------------------------------------------------------------------------------------------------------------------------------------------------------------------------------------------------------------------------------------------------------------------------------------------------------------------------------------------|---------|---|---------|---|---|
| 9  | 이 시스템은 간단하고 이해하기 쉽습니다.                                                                                                                                                                                                                                                                                                                                                                                                                                              | ①       | ② | ③       | ④ | ⑤ |
| 10 | 이 시스템은 내가 이것에서 기대하는 모든 것을 할 수 있게 해줍니다.                                                                                                                                                                                                                                                                                                                                                                                                                              | ①       | ② | ③       | ④ | ⑤ |
| 11 | 비대면진료 시스템을 통해 환자와 쉽게 대화할 수 있습니다.                                                                                                                                                                                                                                                                                                                                                                                                                                    | ①       | ② | ③       | ④ | ⑤ |
| 12 | 비대면진료 시스템을 통해 환자의 말을 또렷하게 들을 수 있습니다.                                                                                                                                                                                                                                                                                                                                                                                                                                | ①       | ② | ③       | ④ | ⑤ |
| 13 | 내 의견을 효과적으로 전달할 수 있었다고 생각합니다.                                                                                                                                                                                                                                                                                                                                                                                                                                       | ①       | ② | ③       | ④ | ⑤ |
| 14 | 비대면진료 시스템을 사용하여 마치 직접 만나는 것처럼 환자를 볼 수 있습니다.                                                                                                                                                                                                                                                                                                                                                                                                                         | ①       | ② | ③       | ④ | ⑤ |
| 15 | 비대면진료 시스템을 통해 제공되는 진료는 대면 진료와 마찬가지로 생각합니다                                                                                                                                                                                                                                                                                                                                                                                                                           | ①       | ② | ③       | ④ | ⑤ |
| 16 | 시스템 사용 중 실수를 해도 쉽고 빠르게 해결할 수 있었습니다.                                                                                                                                                                                                                                                                                                                                                                                                                                 | ①       | ② | ③       | ④ | ⑤ |
| 17 | 시스템은 문제 해결 방법을 명확하게 알려주는 오류 메시지를 제공했습니다.                                                                                                                                                                                                                                                                                                                                                                                                                            | ①       | ② | ③       | ④ | ⑤ |
| 18 | 비대면진료 시스템을 통한 환자와의 소통이 편안했다고 느낍니다.                                                                                                                                                                                                                                                                                                                                                                                                                                  | ①       | ② | ③       | ④ | ⑤ |
| 19 | 비대면진료는 의료 서비스를 받을 수 있는 괜찮은 방법입니다.                                                                                                                                                                                                                                                                                                                                                                                                                                   | ①       | ② | ③       | ④ | ⑤ |
| 20 | 비대면진료 서비스를 계속 시행할 생각입니다.                                                                                                                                                                                                                                                                                                                                                                                                                                            | ①       | ② | ③       | ④ | ⑤ |
|    |                                                                                                                                                                                                                                                                                                                                                                                                                                                                     | → 20-2) |   | → 20-1) |   |   |
|    | 1) 향후에도 비대면진료에 계속 참여하려는 이유는 무엇입니까? (순위응답)<br>① 효율적인 진료시간 관리<br>② 비용 절감<br>③ 대상 환자 확장 가능<br>④ 편의성 (처방전 접수, 조제 기록 확인 등)<br>⑤ 지속적인 환자 모니터링, 관리 용이<br>⑥ 감염병 관리 용이<br>⑦ 대면진료 대비 높은 진료 수가<br>⑧ 기타(     )<br><br>2) 더 이상 비대면진료를 시행하지 않으려는 이유는 무엇입니까? (순위응답)<br>① 환자의 정확한 질병 관련 증상이나 불편함 표현에 한계<br>② 인터넷 연결 문제 또는 기기 사용의 불편함<br>③ 의료사고 발생의 위험성 및 법적 책임 소재 불분명<br>④ 의료진의 업무량 증가<br>⑤ 단순 약 처방 등 진료 과정의 질적 저하<br>⑥ 질환의 증상이 비대면진료만으로는 개선되기 어려움<br>⑦ 개인정보 유출의 위험성<br>⑧ 기타(     ) |         |   |         |   |   |
| 21 | 전반적으로 나는 이 비대면진료 시스템에 만족합니                                                                                                                                                                                                                                                                                                                                                                                                                                          | ①       | ② | ③       | ④ | ⑤ |

Supplementary Figure 1. Continued.

|    |                                                                                                                                                                                                                                                                                                                                                                                                                                                                                                                                                                                                                                                                |         |  |         |  |
|----|----------------------------------------------------------------------------------------------------------------------------------------------------------------------------------------------------------------------------------------------------------------------------------------------------------------------------------------------------------------------------------------------------------------------------------------------------------------------------------------------------------------------------------------------------------------------------------------------------------------------------------------------------------------|---------|--|---------|--|
| 다. |                                                                                                                                                                                                                                                                                                                                                                                                                                                                                                                                                                                                                                                                |         |  |         |  |
|    |                                                                                                                                                                                                                                                                                                                                                                                                                                                                                                                                                                                                                                                                | → 21-2) |  | → 21-1) |  |
|    | <p>1) 다음 중 비대면진료에 만족하는 이유에 대한 순위를 체크해주세요 (순위응답)</p> <p>① 시간 관리 용이<br/>         ② 비용 절감<br/>         ③ 대상 환자 확장 가능<br/>         ④ 편의성 (처방전 접수, 조제 기록 확인 등)<br/>         ⑤ 지속적인 환자 모니터링, 관리 용이<br/>         ⑥ 감염병 관리 용이<br/>         ⑦ 대면진료 대비 높은 진료 수가<br/>         ⑧ 기타( )</p> <p>2) 다음 중 비대면진료에 불만족하는 이유에 대한 순위를 체크해주세요(순위응답)</p> <p>① 환자의 정확한 질병 관련 증상이나 불편함 표현에 한계<br/>         ② 대리수령, 택배수령 등으로 환자에게 복약지도가 어려움<br/>         ③ 기기 사용(휴대폰, 컴퓨터 등)의 불편함<br/>         ④ 의료사고 발생의 위험성 및 법적 책임 소재 불분명<br/>         ⑤ 업무량 증가<br/>         ⑥ 단순 약 처방 등 진료 과정의 질적 저하<br/>         ⑦ 질환의 증상이 비대면진료만으로는 개선되기 어려움<br/>         ⑧ 개인정보 유출의 위험성<br/>         ⑨ 기타( )</p> |         |  |         |  |

### Ⅲ. 비대면진료 허용 범위 관련

문10. 비대면진료 허용 범위에 대해 어떻게 생각하십니까?

| (구 분) 현행 허용 범위                                  | ← 완 화 |  |  |  | 유<br>지 | 강 화 → |  |  |  |
|-------------------------------------------------|-------|--|--|--|--------|-------|--|--|--|
| (대상환자) 6개월이내 동일의료기관 1회 이상 대면진료 경험자에 한정 + 예외적 허용 |       |  |  |  |        |       |  |  |  |
| (의료기관) 의원급 한정 + 병원급 예외적 허용                      |       |  |  |  |        |       |  |  |  |
| (의약품) 직접수령과 대리수령만 허용 + 재택수령 예외적 허용              |       |  |  |  |        |       |  |  |  |
| (진료횟수) 동일 의료기관에서 동일환자에게 한 달에 최대 2회까지 시행         |       |  |  |  |        |       |  |  |  |
| (처방일수) 1회 처방 시 최대 90일 한도 내 처방 가능                |       |  |  |  |        |       |  |  |  |

Supplementary Figure 1. Continued.

문10-1. 비대면진료 허용 범위(제도개선)에 대한 의견을 자유롭게 서술해 주십시오. (선택)  
( )

## V. 비용 관련

문11. 현재 비대면진료 비용(비대면조제 시범사업 관리료)은 적절하다고 생각하십니까?

- ① 매우 낮춰야 한다      ② 약간 낮춰야 한다      ③ 적절하다  
④ 약간 높여야 한다      ⑤ 매우 높여야 한다

문11-1. 적절하다고 생각하는 비대면진료 비용(비대면조제 시범사업 관리료) 수준은 얼마인가요?

\* 비대면조제 시범사업 관리료는 1,020원임

문11-2. 위 문11-1의 답변의 이유에 대해 자유롭게 기술해 주세요.(선택)

( )

## VI. 응답자 특성

문12. 귀하의 성별은 어떻게 되십니까?

- ① 남성      ② 여성

문13. 귀하의 연령은 어떻게 되십니까?

- ① 20대    ② 30대    ③ 40대    ④ 50대    ⑤ 60대    ⑥ 70대    ⑦ 80대 이상

문14. 귀하의 경력은 어떻게 되십니까? (약국 근무에 한함)

- ① 5년 미만  
② 5년 이상 ~10년 미만  
③ 10년 이상~15년 미만  
④ 15년 이상~20년 미만  
⑤ 20년 이상~25년 미만  
⑥ 25년 이상~30년 미만  
⑦ 30년 이상

문19. 귀하께서 의료서비스를 제공하고 계신 지역은 어디입니까? (시군구 단위 입력)

( )
